# Supplementary material for: Folate-Targeted Nanoliposomal Chemophototherapy
Source: MDPI journal article supplement (doi:10.3390/pharmaceutics15102385), 2023-09-26
Supplement: s1 [file s1]

## Supporting Information: Folate-targeted Nanoliposomal Chemophototherapy

Upendra Chitgupi, Yiru Qin, Sanjana Ghosh, Breandan Quinn, Kevin Carter, Xuedan He and Jonathan F. Lovell

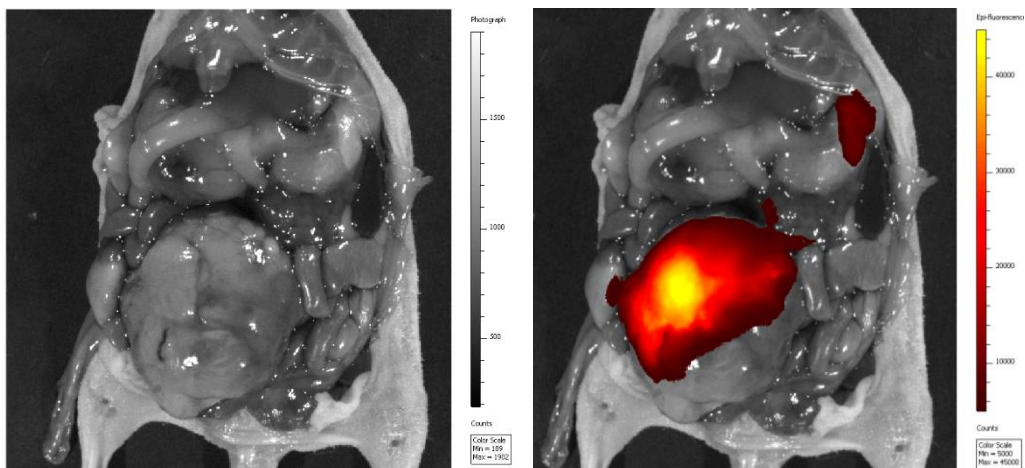

**Figure S1.** In vivo imaging of nude mice bearing intraperitoneal A2780 tumor nodules injected with FA-PoP liposomes and imaged following dissection.
